## A genome-wide atlas of recurrent repeat expansions in human cancer

Graham S. Erwin,<sup>1,\*</sup>† Gamze Gürsoy,<sup>2,3,\*</sup> Rashid Al-Abri,<sup>1</sup> Ashwini Suriyaprakash,<sup>1</sup> Egor Dolzhenko,<sup>4</sup> Kevin Zhu,<sup>1</sup> Christian R. Hoerner,<sup>5</sup> Shannon M. White,<sup>1</sup> Lucia Ramirez,<sup>1</sup> Ananya Vadlakonda,<sup>1</sup> Alekhya Vadlakonda,<sup>1</sup> Konor von Kraut,<sup>1</sup> Julia Park,<sup>1</sup> Charlotte M. Brannon,<sup>1</sup> Daniel A. Sumano,<sup>1</sup> Raushun A. Kirtikar,<sup>1</sup> Alicia A. Erwin,<sup>6</sup> Thomas J. Metzner,<sup>5</sup> Ryan K. C. Yuen,<sup>7,8</sup> Alice C. Fan,<sup>5,9</sup> John T. Leppert,<sup>9,10,11,12</sup> Michael A. Eberle,<sup>4</sup> Mark Gerstein,<sup>13,14,15</sup>†  
Michael P. Snyder<sup>1,†</sup>

1. Department of Genetics, Stanford University, Stanford, California, 94305, USA.
2. Department of Biomedical Informatics, Columbia University, New York, NY, 10032, USA.
3. New York Genome Center, New York, NY, 10013, USA.
4. Illumina, Inc, San Diego, California, 92122, USA.
5. Division of Oncology, Department of Medicine, Stanford University School of Medicine, Stanford, California, 94305, USA.
6. Data Science Program, Northwestern University, Chicago, Illinois, 60611, USA.
7. Genetics and Genome Biology, The Hospital for Sick Children, Toronto, Ontario, Canada. 12. Department of Molecular Genetics, University of Toronto, Toronto, Ontario, Canada.
8. Stanford Cancer Institute, Stanford University School of Medicine, Stanford, California, 94305, USA.

9. Department of Urology, Stanford University School of Medicine, Stanford, California, 94305, USA.

10. Veterans Affairs Palo Alto Health Care System, Palo Alto, California, 94304, USA.

11. Division of Nephrology, Department of Medicine, Stanford University School of Medicine, Stanford, California, 94305, USA.

12. Computational Biology and Bioinformatics Program, Yale University, New Haven, Connecticut, 06511, USA.

14. Molecular Biophysics and Biochemistry Department, Yale University, New Haven, Connecticut, 06511, USA.

15. Department of Computer Science, Yale University, New Haven, Connecticut, 06511, USA.

\*These authors contributed equally to this work.

†To whom correspondence should be addressed: [mpsnyder@stanford.edu](mailto:mpsnyder@stanford.edu), [gerwin@stanford.edu](mailto:gerwin@stanford.edu), [mark@gersteinlab.org](mailto:mark@gersteinlab.org)

## 1 Abstract

2           **Expansion of a single repetitive DNA sequence, termed a tandem repeat (TR), is**  
3 **known to cause more than 50 diseases. However, repeat expansions are often not explored**  
4 **beyond neurological and neurodegenerative disorders. In some cancers, mutations**  
5 **accumulate in short tracts of TRs (STRs), a phenomenon termed microsatellite instability**  
6 **(MSI); however larger repeat expansions have not been systematically analyzed in cancer.**  
7 **Here, we identified TR expansions in 2,622 cancer genomes, spanning 29 cancer types. In 7**  
8 **cancer types, we found 160 recurrent repeat expansions (rREs); most of these (155/160)**  
9 **were subtype specific. We found that rREs were non-uniformly distributed in the genome**  
10 **with an enrichment near candidate cis-regulatory elements, suggesting a role in gene**  
11 **regulation. One rRE located near a regulatory element in the first intron of *UGT2B7* was**  
12 **detected in 34% of renal cell carcinoma samples and was validated by long-read DNA**  
13 **sequencing. Moreover, targeting cells harboring this rRE with a rationally designed,**  
14 **sequence-specific DNA binder led to a dose-dependent decrease in cell proliferation.**  
15 **Overall, our results demonstrate that rREs are an important but unexplored source of**  
16 **genetic variation in human cancers, and we provide a comprehensive catalog for further**  
17 **study.**

18

## 19 Introduction

20           Expansions of tandem DNA repeats (TRs) are known to cause more than 50 devastating  
21 human diseases including Huntington's disease and Fragile X syndrome<sup>1,2</sup>. TR tracts that cause

22 human disease are typically large (more than 100 base pairs)<sup>1</sup>. However, identifying large TRs  
23 with short-read DNA sequencing methods is difficult because they are ubiquitous in the genome,  
24 and many are too large—larger than the typical sequencing read length—to uniquely map to the  
25 reference genome<sup>3</sup>. Thus, many large TRs go undetected with current genomic technologies, and  
26 despite their importance to monogenic disease, the frequency and function of recurrent repeat  
27 expansions (rREs) are unknown in complex human genetic diseases, such as cancer<sup>4</sup>.

28 Previous studies have profiled the landscape of alterations in STRs in cancer genomes<sup>5-7</sup>.  
29 In particular, microsatellite instability (MSI)<sup>8-10</sup>, defined by an alteration in the lengths of short  
30 TRs, is prevalent in various types of cancer including endometrial (30%), stomach (20%), and  
31 colorectal cancers (15%)<sup>5,6,11-12</sup>. However, the systematic analysis of the frequency of genome-  
32 wide large TR expansions has not been studied in cancer even though it was posited more than  
33 25 years ago<sup>13</sup>.

34 Recently, new bioinformatic tools to identify repeat expansions in short-read whole-  
35 genome sequencing (WGS) datasets<sup>14-17</sup> have led to the identification of both known and novel  
36 repeat expansions in human disease, primarily in the area of neurological disorders where repeat  
37 expansions have historically been studied<sup>14-22</sup>. Here, we analyzed 2,622 human cancer genomes  
38 with matching normal samples for the presence of somatic repeat expansions. We identified 160  
39 recurrent repeat expansions (rREs) in seven types of cancer, including many rREs located in or  
40 near known regulatory elements. One of these rREs is observed in 34% of kidney cancers, and  
41 targeting this repeat expansion with sequence-specific DNA binders led to a dose-dependent  
42 decrease in cellular proliferation. Overall, our approach reveals a new class of recurrent changes  
43 in cancer genomes and provides an initial resource of these changes. Our results also suggest an  
44 opportunity for a new class of oncologic TR-targeted therapeutics<sup>23,24</sup>.

45

## 46 **Results**

### 47 **Recurrent repeat expansions in cancer**

48         We collected uniformly-processed alignments of whole-genome sequencing (WGS) of  
49 tumor-normal pairs in the International Cancer Genome Consortium (ICGC), The Cancer  
50 Genome Atlas (TCGA), both a part of the pan-cancer analysis of whole genomes (PCAWG)  
51 datasets<sup>25</sup>. After filtering, these data consist of 2,622 cancer genomes from 2509 patients across  
52 29 different cancer types (**Extended Data Figure 1**). Each cancer type was treated as its own  
53 cohort and analyzed independent of other cancer types. We called somatic recurrent repeat  
54 expansions (rREs) with ExpansionHunter Denovo (EHdn) (see **Methods**), which measures TRs  
55 whose length exceeds the sequencing read length in short-read sequencing datasets<sup>26,27</sup>. That is,  
56 EHdn performs case-control comparisons using a non-parametric statistical test to determine  
57 whether repeat length is longer in tumor genomes compared to matching normal genomes. This  
58 approach is analogous to joint population-level genotyping.

59         We first confirmed the accuracy of EHdn by performing whole-genome short- and long-  
60 read sequencing on 786-O and Caki-1 cancer lines. We found that EHdn captured 72% of the  
61 repeat expansions observed in long-read sequencing (**Extended Data Figure 2**). We also tested  
62 the effect of sequencing coverage on the detection of rREs, and found that EHdn was robust  
63 down to 30x coverage (**Extended Data Figure 2**). We then analyzed 2,622 matching tumor and  
64 normal genomes with EHdn (285,363 TRs). We identified 578 candidate rREs (locus-level false  
65 discovery rate (FDR) < 10%).

66 EHdn is expected to be sensitive to the copy number variations observed in cancer  
67 genomes. We therefore devised and implemented a local read depth filtering method to account  
68 for copy number variants, which normalizes the signal originating from repeat reads using the  
69 read depth in the vicinity of the TR (see **Methods** and **Extended Data Figure 3**). We  
70 benchmarked the local read depth normalization approach with simulated chromosomal  
71 amplifications ranging from two (diploid) to 10 copies. We found that this filter accounts for  
72 changes in chromosomal copy number in a manner superior to the standard global read depth  
73 normalization (**Fig. S5**). Overall, we conclude that local read depth normalization is valuable to  
74 identify *bona fide* rREs in cancer genomes and that many of the rREs that pass the filter are  
75 expanded in cancer. For example, without local read depth normalization, we could only detect  
76 31% of candidate rREs in independent cohorts of matching tumor-normal tissue samples for  
77 breast, prostate, and kidney cancer (15, 18, and 12 patients, respectively). Our local read depth  
78 filtering approach removed >75% (418/578) false-positive candidate rREs (**Extended Data**  
79 **Figure 3**). Importantly, several rRE candidates that were removed are situated in hotspots for  
80 chromosomal amplification, such as chromosomal 8q amplifications that  
81 increase *MYC* production in breast cancer (**Extended Data Figure 3**)<sup>28</sup>. Our analysis suggests  
82 that the standalone EHdn method may have selected these loci due to amplification rather than  
83 repeat expansions, and thus their removal is important.

84 After implementing our local read depth filtering strategy, we increased our detection rate  
85 to 57% (8/14) in independent cohorts (**Extended Data Figure 3**). Importantly, the loci we could  
86 not validate had lower expansion frequencies (5–12%). These rREs may be real but more  
87 difficult to validate in the small validation cohorts (**Table S7**). Thus, we believe this number is  
88 likely an underestimate of the independent detection rate. Of the 14 candidate rREs that failed

89 our local read depth filter, 29% (4/14) were detected in independent cohorts of samples  
90 indicating that the filtering removes most loci that cannot be validated (**Extended Data Figure**  
91 **3**), but also removes some true positives as well.

92 After accounting for local read depth, we detected 160 rREs in 7 human cancers (**Fig.**  
93 **1b**). We expected high concordance with ExpansionHunter given that this tool is related to  
94 EHdn, and indeed we observed a 91% confirmation rate with ExpansionHunter (**Extended Data**  
95 **Figure 4**). We found that most (80%) of these loci are rarely expanded in the general population  
96 (<5% of the time,  $n = 6,514$  genomes, **Extended Data Figure 2**). rREs were primarily observed  
97 in prostate and liver cancer, but we also detected rREs in ovarian, pilocytic astrocytoma, renal  
98 cell carcinoma (RCC), chromophobe RCC, and squamous cell lung carcinoma. Thus, rREs are  
99 found in tissues derived from each of the three primary germ layers (ectoderm, mesoderm, and  
100 endoderm), suggesting these expansions are a phenomenon inherent to the human genome rather  
101 than any tissue-specific process. In prostate and liver cancer, most cancer genomes (93% and  
102 95%, respectively) contain at least one rRE, with some genomes harboring several rREs (**Fig.**  
103 **1c**). For some pathogenic repeats, a larger TR length at birth predisposes an individual to somatic  
104 repeat expansions later in life<sup>1,2</sup>, but we did not generally observe that with rREs (**Table S8**).  
105 Overall, rREs are found in 7 of 29 human cancers examined and are largely cancer subtype-  
106 specific.

107 We next examined whether rREs correlate with changes in MSI<sup>5,6</sup>. We determined  
108 whether samples harboring an rRE had a higher mutation rate in STRs, which is a hallmark of  
109 MSI<sup>5,29</sup>. We did not observe any significant difference in STR mutation rate for genomes with an  
110 rRE compared to those lacking an rRE (two-tailed Wilcoxon rank sum test,  $P = 0.27$ , **Fig. 1d**).  
111 We also compared cancer genomes harboring rREs with cancer genomes previously identified as

112 MSI, using recent results from the PCAWG consortium<sup>29</sup>. We did not observe any enrichment in  
113 MSI for samples harboring an rRE, and instead found a weak but significant preference for rREs  
114 in microsatellite stable (MSS) samples, not MSI samples (Two-tailed Wilcoxon rank-sum test,  $P$   
115 = 0.04, **Fig. 1e**, see also **Extended Data Figure 5**). Thus, our findings might suggest a model  
116 where rREs are formed by a process that is distinct from MSI.

117 In addition to MSI, different mutational processes lead to a signature of somatic  
118 mutations. We tested whether rREs are associated with known mutational signatures by  
119 comparing them to 49 signatures of single base substitutions (SBS) and 11 doublet base  
120 substitutions (DBS)<sup>30</sup>. We performed a multiple linear regression to predict the number of rREs  
121 in a sample based on SBS and DBS signatures, respectively. Only one DBS signature, DBS2,  
122 showed a very weak association with rREs ( $r^2 = 0.12$ ) (**Extended Data Figure 5**).

123

#### 124 **rREs overlap regulatory elements**

125 Among the 160 rREs, we observed a variety of different motifs (**Table S1**) whose repeat  
126 unit length follows a bimodal distribution, consistent with REs identified in other diseases (**Fig.**  
127 **2a**, **Extended Data Figures 6 and 7**)<sup>27</sup>. rREs are distributed across a range of GC content;  
128 approximately half (76/160) have GC content less than 50% (**Table S1**). Six rREs contained a  
129 known pathogenic motif, all of which were GAA<sup>31</sup>. We examined if any motifs were enriched in  
130 the rRE catalog compared to the tandem repeat finder (TRF) catalog. Although this enrichment  
131 could arise from a biological and/or technical process, we found that one of the three enriched  
132 motifs was GAA (**Fig. 2b**). As an example, Friedreich's ataxia is caused by a repeat expansion of  
133 a GAA motif in the intron of the frataxin gene. This expansion leads to DNA methylation and the



134 deposition of repressive chromatin marks, leading to robust repression of the gene and  
135 development of disease<sup>31</sup>. Because of this, we suspect some of the rREs found in cancer might  
136 alter the epigenome and affect gene regulatory networks.

137 rREs were distributed non-uniformly across the genome, with a bias towards the ends of  
138 chromosome arms (**Fig. 2c, Extended Data Figure 6**). This observation is consistent with  
139 previous reports of TRs and structural variants<sup>15,32</sup>. We also examined the distribution of rREs  
140 relative to gene features with `annotatr` (**Fig. 2d**)<sup>33</sup>. The 7% of rREs labeled as exonic appeared  
141 proximal to, but not within, exons, but others were in introns, untranslated regions (UTRs), and  
142 splice sites. These results suggest rREs may play different functional roles in the regulation of  
143 gene expression.

144 We measured the distance between rREs and candidate cis-regulatory elements  
145 (cCREs)<sup>34</sup>; cCREs comprise approximately one million functional elements including promoters,  
146 enhancers, DNase-accessible regions, and insulators bound by CCCTC-binding factor (CTCF).  
147 An rRE near a regulatory element could alter the function of that regulatory element, as is  
148 observed in Fragile X syndrome and Friedreich's ataxia<sup>1</sup>. Interestingly, rREs are located closer to  
149 cCREs than expected by chance, and we find that 47 of 160 rREs directly overlap with a known  
150 cCRE (Welch's *t*-test,  $P = 6.00e-45$ , **Fig. 2e & Extended Data Figure 7**). Thus, rREs are often  
151 found in or near functional regions of the genome.

152

### 153 **rREs with links to cancer**

154 We mapped each rRE to the nearest genes and found that nine rREs map to Tier 1 genes  
155 present in the census of somatic mutations in cancer (COSMIC) database (**Fig. 3, Table S1**). We

156 also observed a strong correlation with cancer-related genes (Jensen disease-gene associations<sup>35</sup>).  
157 That is, four of the top five diseases associated with the collection of 160 rRE are cancers (**Fig.**  
158 **3b, Table S4**).

159 To examine whether some rREs play a role in oncogenesis, we looked at their association  
160 with previously-identified cancer risk loci. Many rREs were identified in prostate cancer, and 63  
161 loci have previously been associated with susceptibility to prostate cancer from available  
162 genome-wide association studies<sup>36</sup>. When we examined the co-localization of rREs and cancer  
163 risk loci in prostate cancer, we found that rREs are located closer to prostate cancer susceptibility  
164 loci than standard STRs or by chance (Student's *t*-test, FDR  $q = 0.08$ , **Fig. 3c & Extended Data**  
165 **Figure 7**).

166 We next studied the relationship between the occurrence of the census of somatic  
167 mutations in cancer (COSMIC) genes to the occurrence of rREs (**Fig. 3d**). Interestingly, we  
168 found that there are five COSMIC genes whose somatic mutations are found to occur  
169 significantly more in patients' genomes with no rREs, after correcting for multiple hypothesis  
170 testing. Among them, *TP53* was particularly striking, as wildtype *TP53* is critical for mediating  
171 the pathogenic effects of repeat expansions in both Amyotrophic Lateral Sclerosis (ALS) and  
172 Huntington's Disease<sup>37,38</sup>. Consistent with these findings, a DNA damage repair gene in yeast,  
173 *Rad53*, is phosphorylated and activated in the presence of an expanded repeat<sup>39</sup>.

174 MSI-high cancers are often correlated with higher levels of immune cell infiltration<sup>40</sup>. We  
175 hypothesized that some rREs might also be associated with higher immune cell infiltration, but  
176 we did not observe a correlation between cytotoxic activity<sup>41</sup> and the presence of an rRE  
177 (**Extended Data Figure 9**). Because there are matching RNA-seq data for only 4 of 160 rREs,

178 this analysis warrants further investigation as more matching WGS and RNA-seq datasets  
179 become available.

180

### 181 **An rRE in the *UGT2B7* gene observed in RCC**

182 A GAAA expansion located in the intron of *UGT2B7* was observed in 34% of RCC  
183 samples. *UGT2B7* is a glucuronidase that clears small molecules—including  
184 chemotherapeutics—from the body and is selectively expressed in the kidney and liver<sup>42</sup>.

185 With gel electrophoresis, we identified the expected TR size of ~26 GAAA repeats in the  
186 normal kidney cell line, HK-2, corresponding closely to the length observed in the reference  
187 genome (**Fig. 4a**). In contrast, we identified an expansion between ~63 and ~160 GAAA repeat  
188 units in 5 of 8 clear cell RCC cell lines. Most expansions were heterozygous (**Fig. 4a**). Long-  
189 read DNA sequencing with highly-accurate PacBio HiFi reads confirmed the PCR results and  
190 revealed the precise structure of this repeat expansion at single base pair resolution for both 786-  
191 O and Caki-1 (**Fig. 4b**). We also detected this repeat expansion in five out of 12 primary kidney  
192 tumor tissue samples from patients with clear cell RCC (**Extended Data Figure 8**), which  
193 showed more heterogeneity than the RCC cell lines; more heterogeneity might be expected for  
194 human tumor samples compared to the clonal cell lines.

195 Given that *UGT2B7* is selectively expressed in the liver and kidney, and that it plays a  
196 role in clearing small molecules from the body, we examined whether this rRE may be located  
197 near any functional elements that could regulate its expression. Analysis of the chromatin  
198 environment surrounding the rRE in *UGT2B7* revealed a nearby enhancer, raising the possibility  
199 that this rRE alters the expression of *UGT2B7* (**Fig. 4c**). The repeat motif of this rRE, GAAA,

200 appears similar to the pathogenic repeat motif found in Friedreich's ataxia, which is GAA. The  
201 pathogenic GAA repeat expansion blocks *FXN* expression<sup>31</sup>. We therefore hypothesized that the  
202 intronic GAAA repeat expansion might repress the expression of *UGT2B*; we found a modest  
203 decrease in expression that was not statistically significant (**Extended Data Figure 8**). While  
204 this rRE is also not associated with a difference in survival (**Extended Data Figure 8**), it is  
205 associated with a significant decrease in a transcript isoform in *UGT2B7* (Wald test with FDR  
206 correction,  $P = 0.0048$ ) (**Fig. 4e**). Interestingly, a shift in isoform usage of *UGT2B7* has been  
207 noted in cancer<sup>43</sup>.

208

## 209 **Repeat-targeting anti-proliferative agents**

210 Do GAAA repeat expansions contribute to cell proliferation? We previously showed that  
211 targeting a related TR motif, GAA, with synthetic transcription elongation factors (Syn-TEF1)  
212 reverses pathogenesis in several models of Friedreich's ataxia<sup>23</sup>. Therefore, if the GAAA rRE in  
213 RCC behaves similarly, then a Syn-TEF targeting GAAA may have anti-proliferative activity.  
214 We rationally designed Syn-TEF3, which contains a GAAA-targeting polyamide (PA), and a  
215 bromodomain ligand, JQ1, designed to recruit part of the transcriptional machinery (**Fig. 5a** and  
216 **Fig. S2**). We also included a control molecule, Syn-TEF4, which targets GGAA TRs, as well as  
217 polyamides (PAs) PA3 and PA4 that lack the JQ1 domain. We have previously shown that Syn-  
218 TEFs and PAs localize to repetitive TRs in living cells<sup>23,44</sup>.

219 The effect of Syn-TEFs on cell proliferation was examined (**Fig. 5b**). Caki-1 and 786-O were  
220 selected because they have the largest (161) and smallest (24) GAAA tracts within the first  
221 intron of *UGT2B7*, respectively. In a dose-dependent manner, we observed that Syn-TEF3 led to

222 a significant decrease in the proliferation of Caki-1 cells but had little effect on 786-O cells. Syn-  
223 TEF4, which does not target a GAAA TR, did not significantly decrease proliferation in either of  
224 the cell lines tested, demonstrating the requirement for GAAA-specific targeting (**Fig. 5b**). Two  
225 additional GAAA repeat expansion cell lines as well as two additional control non-expanded  
226 lines showed a similar association between Syn-TEF sensitivity and the presence of the repeat  
227 expansion (**Extended Data Figure 10**). Consistent with this finding, Caki-1 cells treated with  
228 Syn-TEF3 exhibited a significant increase in cell death compared to DMSO control, as measured  
229 by propidium iodide staining (**Fig. 5c,d** and **Extended Data Figure 10**). In contrast, 786-O cells  
230 treated with Syn-TEF3 showed no significant difference in propidium iodide-positive cells  
231 compared to DMSO (**Fig. 5c,d** and **Extended Data Figure 10**). Importantly, the Syn-TEF4,  
232 PA3, and PA4 control agents exhibited no significant effect on cell death in either cell line  
233 compared to vehicle control (**Fig. 5c,d** and **Extended Data Figure 10**). These results suggest  
234 that GAAA repeat expansions may represent a genetic vulnerability in RCC and provide a proof-  
235 of-principle study for the functional role of rREs in cancer.

236

## 237 **Discussion**

238 Here, for the first time, we conduct a genome-wide survey of recurrent repeat expansions  
239 (rREs) across cancer genomes, distinct from MSI. Our data identified (i) 160 rREs in 7 human  
240 cancers and revealed that (ii) most (155 of 160) rREs are cancer subtype-specific; (iii) amongst  
241 diseases, rREs are enriched in human cancer loci and tended to occur near regulatory elements;  
242 (iv) recurrent repeat expansions do not correlate with MSI status; and (v) targeting a GAAA  
243 repeat expansion in RCC with a small molecule leads to cancer cell killing. Taken together, our

244 results uncover an unexplored genetic alteration in cancer genomes with important mechanistic  
245 and therapeutic implications.

246 Cancer cells evolve and adapt in response to environmental or pharmacological  
247 perturbations, but the mechanisms supporting these changes are still being uncovered. One  
248 source of genetic variation that may enable genetic adaptations is TR DNA sequences. Mutations  
249 in repeat length of TRs can occur up to 10,000 times more frequently than single nucleotide  
250 variants (SNVs) or insertions and deletions (INDELs)<sup>1</sup>. Repeat expansions may provide a source  
251 of genetic variation to enable cancer cells to adapt to changes in the environment<sup>45</sup>. Indeed,  
252 colorectal cancers acquire mutations in STRs in response to targeted therapy just 24 hours  
253 following treatment, suggesting that mutations in these regions may associate with rapid  
254 evolution<sup>46</sup>. In future studies, it will be particularly valuable to study repeat expansions in the  
255 genomes of cancer cells that face changing environments, including metastasis and  
256 chemotherapy.

257 Historically, MSI has been the focus of efforts to profile changes in STRs in cancer  
258 genomes because specific cancer-causing genetic alterations in repair genes can promote  
259 widespread STR alterations. Interestingly, we find little to no correlation between rREs and MSI.  
260 These results are consistent with previous findings in which the correlation between MSI and  
261 repeat instability at larger TRs is not definitive<sup>47</sup>. MSI may contribute to a subtype of rREs that  
262 we have not yet uncovered, or rREs may arise from a mutation process that is distinct from that  
263 of MSI. There are several different DNA cellular repair systems, and presumably the rREs that  
264 we observed are due to very specific loci-associated mechanisms or activities. Some of these  
265 repeat expansions may be due to cis-regions with interesting DNA or chromatin configurations

266 that are prone to expansion at distinct loci, rather than gene mutations that cause global trans  
267 effects, as occurs in MSI.

268         There are numerous mechanisms by which a repeat expansion can alter cellular function.  
269 Known pathogenic repeat expansions can alter the coding sequence of a protein, such as in the  
270 case of Huntington's disease. However, there are several repeat expansions that occur in non-  
271 coding regions that alter gene expression<sup>1</sup>. In other instances, the repeat expansion can lead to a  
272 pathogenic RNA molecule (myotonic dystrophy) or protein (ALS)<sup>1</sup>. Finally, repeat expansions in  
273 MSI-associated cancers, which are too small to detect by EHDn, can disrupt DNA replication<sup>48</sup>.  
274 Thus, our catalog represents a powerful resource to explore the mechanisms by which rREs alter  
275 cellular function in cancer.

276         The identification of repeat expansions would benefit from improved sequencing  
277 coverage and increased cohort sizes. Like other tools that identify repeat expansions, we cannot  
278 distinguish zygosity from sample heterogeneity or obtain precise lengths of repeats. Our  
279 independent experimental validation showed that some repeat expansions are heterogeneous  
280 (**Extended Data Figure 8**). We suspect that tumor heterogeneity may lead to an underreporting  
281 of rREs. Furthermore, this study focuses on somatic mutations, but repeat expansions that occur  
282 in the context of normal development will be another important area of study<sup>4</sup>. Furthermore,  
283 germline events that predispose an individual to cancer would also be worthwhile to study; there  
284 is evidence that a TR in the androgen receptor gene is associated with prostate cancer onset,  
285 tumor stage, and tumor grade<sup>49</sup>. Finally, we only detected changes in repeat length that were  
286 greater than sequencing read length. In future studies, it will be important to explore recurrent  
287 changes that are smaller in length. Finally, it is important to acknowledge that rREs could be  
288 mediators of phenotypes or passengers that result from genetic instability and clonal selection. In

289 the one instance where we targeted the rRE in RCC, cell proliferation was reduced, consistent  
290 with a mediator role for this rRE. Distinguishing between these two possibilities for each rRE is  
291 an important line of work in the future.

292 To our knowledge, this is the first genome-wide survey of repeat expansions beyond a  
293 neurological or neurodegenerative disorder. Thousands of high-quality whole genome sequences  
294 exist for many diseases, and our data provide evidence that repeat expansions should be explored  
295 beyond the classical bounds of neurodegenerative diseases where they have been most  
296 investigated.

297 A careful dissection of repeat expansions in human disease may reveal their role as  
298 causative or contributory. We show here that repeat expansions can be targeted by tandem  
299 repeat-targeting precision molecules<sup>23</sup>. Thus, our results set the stage for a new class of  
300 therapeutics to be deployed in cancer and other diseases.

301



302 **References**

- 303 1. Hannan, A. J. Tandem repeats mediating genetic plasticity in health and disease. *Nat. Rev.*  
304 *Genet.* **19**, 286–298 (2018).
- 305 2. Gall-Duncan, T., Sato, N., Yuen, R. K. C. & Pearson, C. E. Advancing genomic  
306 technologies and clinical awareness accelerates discovery of disease-associated tandem  
307 repeat sequences. *Genome Res.* **32**, 1–27 (2022).
- 308 3. Ho, S. S., Urban, A. E. & Mills, R. E. Structural variation in the sequencing era. *Nat. Rev.*  
309 *Genet.* (2019) doi:10.1038/s41576-019-0180-9.
- 310 4. Hannan, A. J. Tandem repeat polymorphisms: modulators of disease susceptibility and  
311 candidates for ‘missing heritability’. *Trends Genet.* **26**, 59–65 (2010).
- 312 5. Hause, R. J., Pritchard, C. C., Shendure, J. & Salipante, S. J. Classification and  
313 characterization of microsatellite instability across 18 cancer types. *Nat. Med.* **22**, 1342–  
314 1350 (2016).
- 315 6. Cortes-Ciriano, I., Lee, S., Park, W. Y., Kim, T. M. & Park, P. J. A molecular portrait of  
316 microsatellite instability across multiple cancers. *Nat. Commun.* **8**, 1–12 (2017).
- 317 7. Grünewald, T. G. P. *et al.* Chimeric EWSR1-FLI1 regulates the Ewing sarcoma  
318 susceptibility gene EGR2 via a GGAA microsatellite. *Nat. Genet.* **47**, 1073–1078 (2015).
- 319 8. Aaltonen, L. A. *et al.* Clues to the pathogenesis of familial colorectal cancer. *Science (80-*  
320 *).* **260**, 812 LP – 816 (1993).
- 321 9. Thibodeau, S. N., Bren, G. & Schaid, D. Microsatellite instability in cancer of the  
322 proximal colon. *Science (80- ).* **260**, 816 LP – 819 (1993).

- 323 10. Ionov, Y., Peinado, M. A., Malkhosyan, S., Shibata, D. & Perucho, M. Ubiquitous  
324 somatic mutations in simple repeated sequences reveal a new mechanism for colonic  
325 carcinogenesis. *Nature* **363**, 558–561 (1993).
- 326 11. Wooster, R. *et al.* Instability of short tandem repeats (microsatellites) in human cancers.  
327 *Nat. Genet.* **6**, 152–156 (1994).
- 328 12. Risinger, J. I. *et al.* Genetic Instability of Microsatellites in Endometrial Carcinoma.  
329 *Cancer Res.* **53**, 5100 LP – 5103 (1993).
- 330 13. Panzer, S., Kuhl, D. P. A. & Caskey, C. T. Unstable triplet repeat sequences: A source of  
331 cancer mutations? *Stem Cells* **13**, 146–157 (1995).
- 332 14. Dolzhenko, E. *et al.* Detection of long repeat expansions from PCR-free whole-genome  
333 sequence data. *Genome Res.* **27**, 1895–1903 (2017).
- 334 15. Dolzhenko, E. *et al.* ExpansionHunter Denovo: a computational method for locating  
335 known and novel repeat expansions in short-read sequencing data. *Genome Biol.* **21**, 102  
336 (2020).
- 337 16. Dashnow, H. *et al.* STRetch: detecting and discovering pathogenic short tandem repeat  
338 expansions. *Genome Biol.* **19**, 121 (2018).
- 339 17. Mousavi, N., Shleizer-Burko, S., Yanicky, R. & Gymrek, M. Profiling the genome-wide  
340 landscape of tandem repeat expansions. *Nucleic Acids Res.* **47**, e90 (2019).
- 341 18. Kristmundsdottir, S., Eggertsson, H. P., Arnadottir, G. A. & Halldorsson, B. V. popSTR2  
342 enables clinical and population-scale genotyping of microsatellites. *Bioinformatics* (2019)  
343 doi:10.1093/bioinformatics/btz913.

- 344 19. Tang, H. *et al.* Profiling of Short-Tandem-Repeat Disease Alleles in 12,632 Human  
345 Whole Genomes. *Am. J. Hum. Genet.* **101**, 700–715 (2017).
- 346 20. Rafehi, H. *et al.* Bioinformatics-Based Identification of Expanded Repeats: A Non-  
347 reference Intronic Pentamer Expansion in RFC1 Causes CANVAS. *Am. J. Hum. Genet.*  
348 **105**, 151–165 (2019).
- 349 21. Hannan, A. J. Repeat DNA expands our understanding of autism spectrum disorder.  
350 *Nature* **589**, 200–202 (2021).
- 351 22. Mitra, I. *et al.* Patterns of de novo tandem repeat mutations and their role in autism.  
352 *Nature* **589**, 246–250 (2021).
- 353 23. Erwin, G. S. *et al.* Synthetic transcription elongation factors license transcription across  
354 repressive chromatin. *Science (80-. )*. **358**, 1617–1622 (2017).
- 355 24. Nakamori, M. *et al.* A slipped-CAG DNA-binding small molecule induces trinucleotide-  
356 repeat contractions in vivo. *Nat. Genet.* **52**, (2020).
- 357 25. The ICGC/TCGA Pan-Cancer Analysis of Whole Genomes Consortium. Pan-cancer  
358 analysis of whole genomes. *Nature* **578**, 82–93 (2020).
- 359 26. Tankard, R. M. *et al.* Detecting Expansions of Tandem Repeats in Cohorts Sequenced  
360 with Short-Read Sequencing Data. *Am. J. Hum. Genet.* **103**, 858–873 (2018).
- 361 27. Trost, B. *et al.* Genome-wide detection of tandem DNA repeats that are expanded in  
362 autism. *Nature* **589**, 80–86 (2020).
- 363 28. Tirkkonen, M. *et al.* Molecular cytogenetics of primary breast cancer by CGH. *Genes,*  
364 *Chromosom. Cancer* **21**, 177–184 (1998).

- 365 29. Fujimoto, A. *et al.* Comprehensive analysis of indels in whole-genome microsatellite  
366 regions and microsatellite instability across 21 cancer types. *Genome Res.* **30**, 334–346  
367 (2020).
- 368 30. Alexandrov, L. B. *et al.* The repertoire of mutational signatures in human cancer. *Nature*  
369 **578**, 94–101 (2020).
- 370 31. Sandi, C., Al-Mahdawi, S. & Pook, M. A. Epigenetics in Friedreich’s Ataxia: Challenges  
371 and Opportunities for Therapy. *Genet. Res. Int.* **2013**, 852080 (2013).
- 372 32. Audano, P. A. *et al.* Characterizing the Major Structural Variant Alleles of the Human  
373 Genome. *Cell* **176**, 663-675.e19 (2019).
- 374 33. Cavalcante, R. G. & Sartor, M. A. annotatr: genomic regions in context. *Bioinformatics*  
375 **33**, 2381–2383 (2017).
- 376 34. Moore, J. E. *et al.* Expanded encyclopaedias of DNA elements in the human and mouse  
377 genomes. *Nature* **583**, 699–710 (2020).
- 378 35. Pletscher-Frankild, S., Pallejà, A., Tsafou, K., Binder, J. X. & Jensen, L. J. DISEASES:  
379 Text mining and data integration of disease–gene associations. *Methods* **74**, 83–89 (2015).
- 380 36. Schumacher, F. R. *et al.* Association analyses of more than 140,000 men identify 63 new  
381 prostate cancer susceptibility loci. *Nat. Genet.* **50**, 928–936 (2018).
- 382 37. Maor-Nof, M. *et al.* p53 is a central regulator driving neurodegeneration caused by  
383 C9orf72 poly(PR). *Cell* **184**, 689-708.e20 (2021).
- 384 38. Bae, B.-I. *et al.* p53 Mediates Cellular Dysfunction and Behavioral Abnormalities in  
385 Huntington's Disease. *Neuron* **47**, 29–41 (2005).

- 386 39. Sundararajan, R. & Freudenreich, C. H. Expanded CAG/CTG Repeat DNA Induces a  
387 Checkpoint Response That Impacts Cell Proliferation in *Saccharomyces cerevisiae*. *PLOS*  
388 *Genet.* **7**, e1001339 (2011).
- 389 40. Lin, A., Zhang, J. & Luo, P. Crosstalk Between the MSI Status and Tumor  
390 Microenvironment in Colorectal Cancer . *Frontiers in Immunology* vol. 11 2039 (2020).
- 391 41. Rooney, M. S., Shukla, S. A., Wu, C. J., Getz, G. & Hacohen, N. Molecular and Genetic  
392 Properties of Tumors Associated with Local Immune Cytolytic Activity. *Cell* **160**, 48–61  
393 (2015).
- 394 42. Barre, L. *et al.* Substrate specificity of the human UDP-glucuronosyltransferase UGT2B4  
395 and UGT2B7. *FEBS J.* **274**, 1256–1264 (2007).
- 396 43. Rouleau, M. *et al.* Divergent Expression and Metabolic Functions of Human  
397 Glucuronosyltransferases through Alternative Splicing. *Cell Rep.* **17**, 114–124 (2016).
- 398 44. Erwin, G. S. G. S. *et al.* Synthetic genome readers target clustered binding sites across  
399 diverse chromatin states. *Proc. Natl. Acad. Sci.* **113**, E7418–E7427 (2016).
- 400 45. Kim, J. C. & Mirkin, S. M. The balancing act of DNA repeat expansions. *Curr. Opin.*  
401 *Genet. Dev.* **23**, 280–288 (2013).
- 402 46. Russo, M. *et al.* Adaptive mutability of colorectal cancers in response to targeted  
403 therapies. *Science (80-. )*. **366**, 1473 LP – 1480 (2019).
- 404 47. Persi, E. *et al.* Proteomic and genomic signatures of repeat instability in cancer and  
405 adjacent normal tissues. *Proc. Natl. Acad. Sci.* **116**, 16987 LP – 16996 (2019).
- 406 48. van Wietmarschen, N. *et al.* Repeat expansions confer WRN dependence in microsatellite-

407           unstable cancers. *Nature* **586**, 292–298 (2020).

408    49.   Edward, G. *et al.* The CAG repeat within the androgen receptor gene and its relationship  
409           to prostate cancer. *Proc. Natl. Acad. Sci.* **94**, 3320–3323 (1997).

410

411 **Figure 1. Genome-wide detection of recurrent repeat expansions (rREs) in cancer genomes.**

412 a) Scheme of method to identify rREs in 2,509 patients across 29 human cancers. 1, head and  
413 neck squamous cell carcinoma (Head-SCC); 2, Skin-Melanoma; 3, glioblastoma (CNS-GBM);  
414 4 medulloblastoma (CNS-Medullo); 5, pilocytic astrocytoma (CNS-PiloAstro); 6, esophageal  
415 adenocarcinoma (Eso-AdenoCA), 7, osteosarcoma (Bone-Osteosarc); 8, leiomyosarcoma  
416 (Bone-Leiomyo); 9, thyroid adenocarcinoma (Thy-AdenoCA); 10, lung adenocarcinoma  
417 (Lung-AdenoCA); 11, lung squamous cell carcinoma (Lung-SCC); 12, mammary gland  
418 adenocarcinoma (Breast-AdenoCA); 13, B-cell non-Hodgkin lymphoma (Lymph-BNHL); 14,  
419 chronic lymphocytic leukemia (Lymph-CLL); 15, acute myeloid leukemia (Myeloid-AML); 16,  
420 myeloproliferative neoplasm (Myeloid-MPN); 17, biliary adenocarcinoma (Biliary-AdenoCA);  
421 18, hepatocellular carcinoma (Liver-HCC); 19, stomach adenocarcinoma (Stomach-AdenoCA);  
422 20, pancreatic adenocarcinoma (Panc-AdenoCA), 21, pancreatic neuroendocrine tumor  
423 (Panc-Endocrine); 22, colorectal adenocarcinoma (ColoRect-AdenoCA); 23, prostatic  
424 adenocarcinoma (Prost-AdenoCA); 24, chromophobe renal cell carcinoma (Kidney-ChRCC);  
425 25, renal cell carcinoma (Kidney-RCC); 26, papillary renal cell carcinoma (Kidney-pRCC); 27,  
426 uterine adenocarcinoma (Uterus-AdenoCA); 28, ovarian adenocarcinoma (Ovary-AdenoCA);  
427 29, transitional cell carcinoma of the bladder (Bladder-TCC). b) Distribution of rREs across  
428 cancer types. c) Proportion of cancer genomes with rREs. d) STR mutation rate for cancer  
429 genomes with and without a rRE. Two-tailed Wilcoxon rank sum test. e) Distribution of rREs  
430 across microsatellite stable (MSS) and microsatellite instability high (MSI-high) cancers. Chi-  
431 square test with Yates' correction.

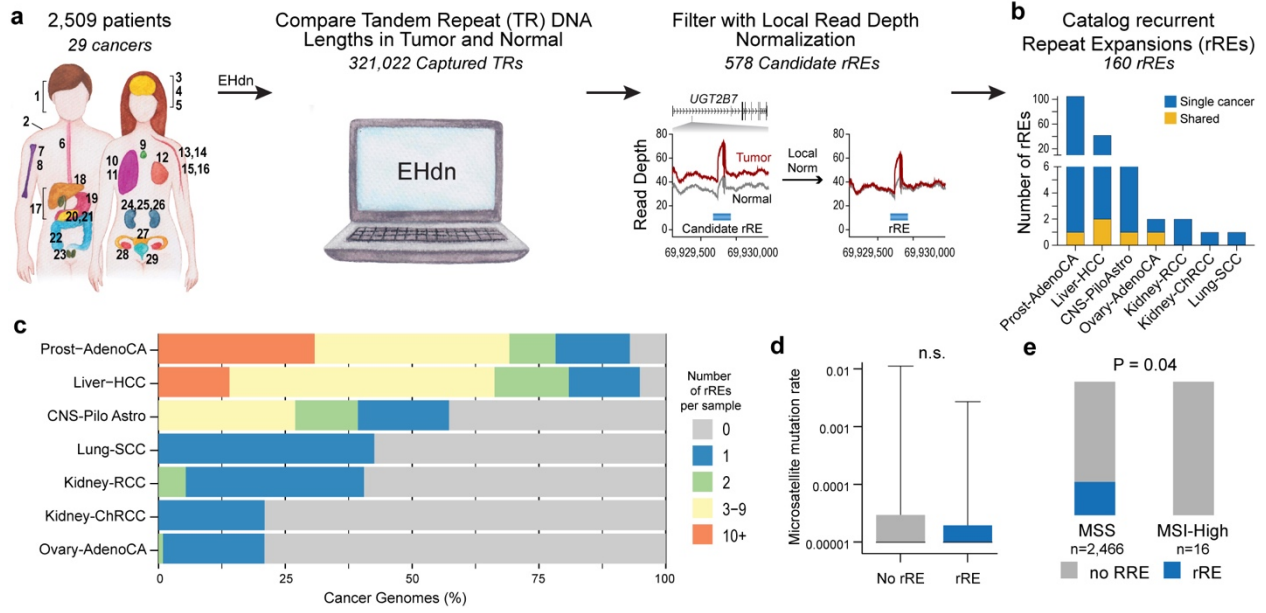

432

433

434

435



436 **Figure 2. Features of rREs.** a) Distribution of the repeat unit (motif) for rREs. b) Motifs  
437 enriched in the catalog of rREs. c) Distance of rREs to the end of the chromosome arm. d)  
438 Proportion of genic features that overlap with rREs. UTR, untranslated region. e) Distance of  
439 simple repeats and rREs to the nearest ENCODE candidate cis-regulatory element (cCRE).  
440 Center values represent the median. Welch's *t*-test.

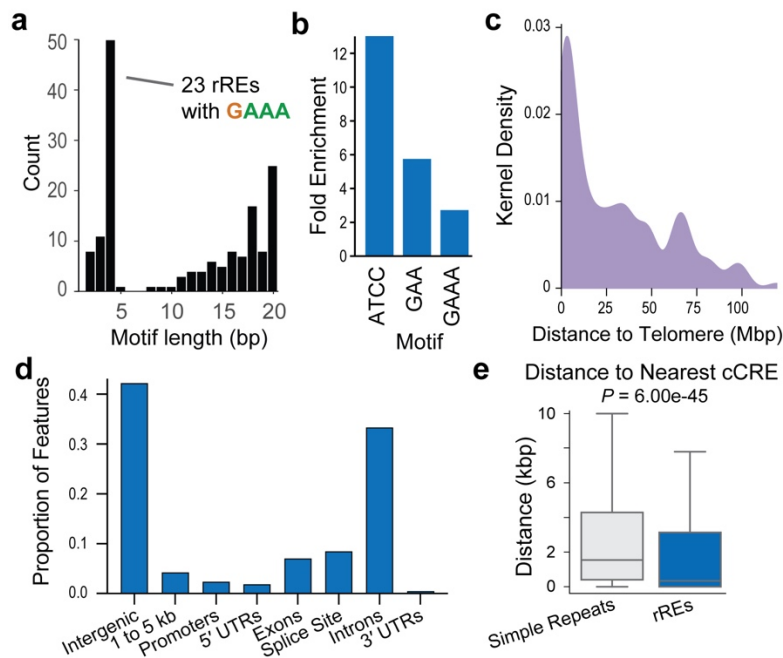

441

442

443

444

445 **Figure 3. Association of rREs with cancer features.** a) Association of rREs with human  
 446 diseases. b) Frequency of rREs in genes of interest, including the nine COSMIC genes, are  
 447 highlighted. c) Distance of simple repeats, non-prostate cancer rREs, and prostate-cancer rREs to  
 448 the nearest prostate cancer risk locus. Center values represent the median. Statistical significance  
 449 was measured with Welch's *t*-test (\*  $q < 0.10$ ). d) Association between SNVs in genes in the  
 450 census of somatic mutations in cancer (COSMIC) Tier 1 genes and the presence of rREs.  
 451 Student's *t*-test with FDR correction by Benjamini-Hochberg.

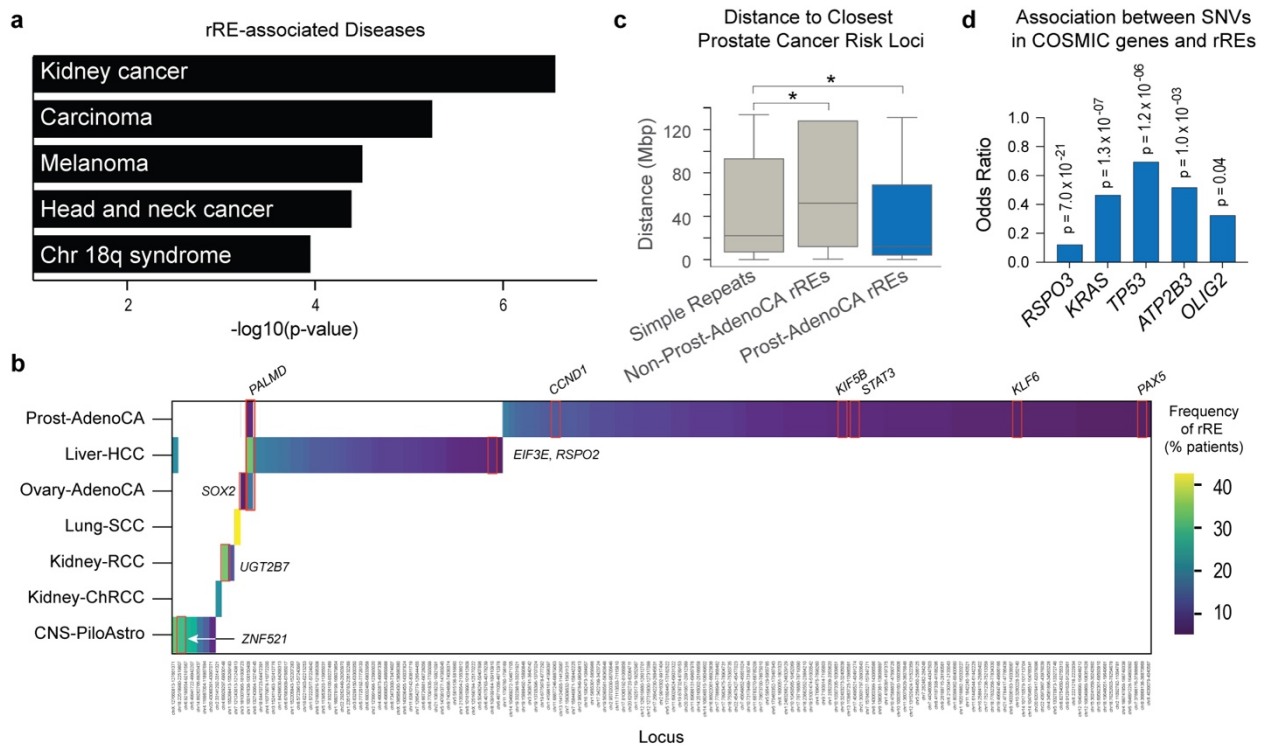

452

453

454

455 **Figure 4. An rRE in Renal Cell Carcinoma (RCC).** a) Gel electrophoresis of the GAAA  
456 tandem repeat in RCC samples. This analysis was performed in duplicate and the gel is  
457 representative of the results. For gel source data, see **Fig. S1**. b) Visualization of long-read  
458 sequencing of GAAA rRE in the intron of *UGT2B7*. Data are from PacBio HiFi sequencing. c)  
459 The locus surrounding the rRE detected in the intron of *UGT2B7*. Signal traces of Pol2,  
460 H3K27ac, H3K4me1, and p300 in HepG2 cells are shown. Candidate cis-regulatory elements  
461 (cCREs) and chromatin states (ChromHMM) are also depicted. d) Expression of *UGT2B7*  
462 isoform ENST00000508661.1 in RCC samples as a function of the detection of the rRE in  
463 *UGT2B7* (Normalized Expression, Counts). Center values represent the median. Significance  
464 was measured by Wald test with FDR correction (Benjamini-Hochberg).

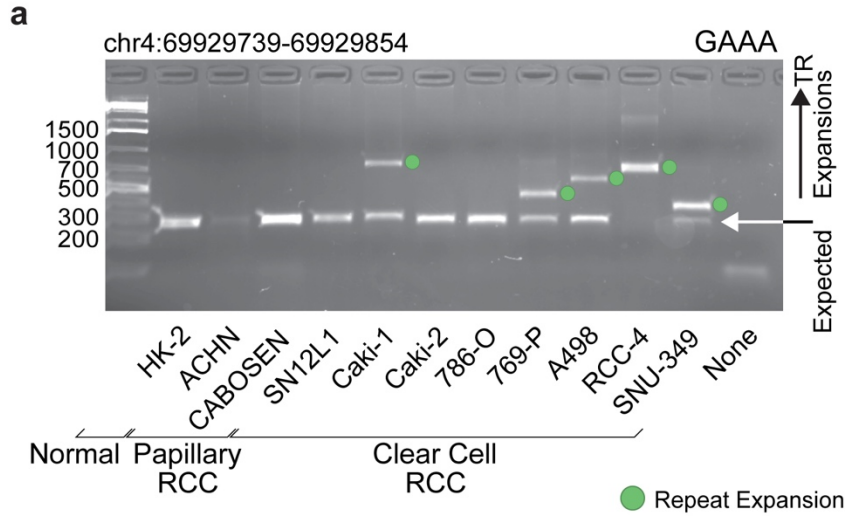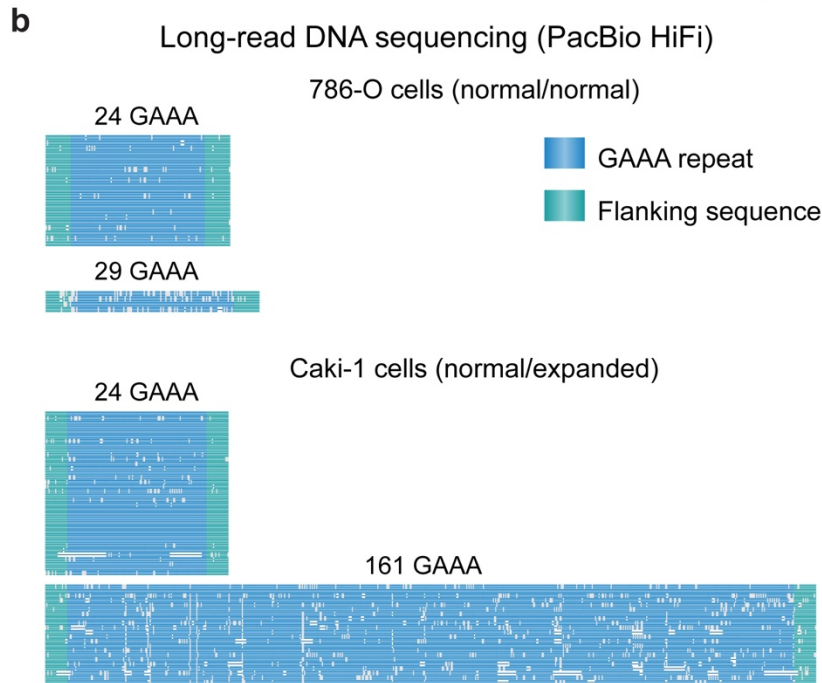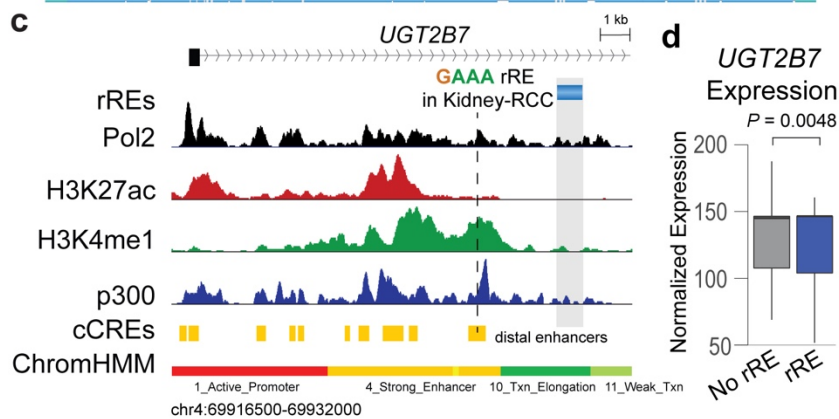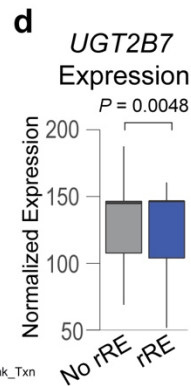

465

466

467 **Figure 5. The design and characterization of GAAA-targeting molecules in RCC. a)**  
468 Chemical structures of Syn-TEF3, PA3, Syn-TEF4 and PA4. Syn-TEF3, and PA3 target 5'-  
469 AAGAAAGAA-3'. Syn-TEF4\* and PA4 target 5'-AAGGAAGG-3'. The structures of *N*-  
470 methylpyrrole (open circles), *N*-methylimidazole (filled circles), and  $\beta$ -alanine (diamonds) are  
471 shown. *N*-methylimidazole is bolded for clarity. The structure of JQ1 linked to polyethylene  
472 glycol (PEG<sub>6</sub>) is represented as a blue circle. The structure of isophthalic acid and linker is  
473 represented as IPA. Complete chemical structures are depicted in **Fig. S2**. The asterisk indicates  
474 the site where the R group attaches to the polyamide. Mismatches formed with Syn-TEF4 and  
475 PA4 are indicated with orange. b) Relative cell density of RCC cell lines Caki-1 and 786-O  
476 following treatment (72 h) with compounds, as indicated. Relative cell density was measured  
477 with CCK-8 assay (see **Methods**). Results are mean  $\pm$  SEM ( $n = 4$ ). c) Quantitation of the  
478 percentage of propidium iodide-positive cells. Whiskers are minimum and maximum values. \*  $p$   
479  $< 0.05$ . P values are from a one-way ANOVA with multiple comparisons. d) Live cell  
480 microscopy of Caki-1 and 786-O cells stained with propidium iodide (red) and Hoechst 33342  
481 (blue). Scale bars, 100  $\mu$ m. See also **Extended Data Figure 10**.

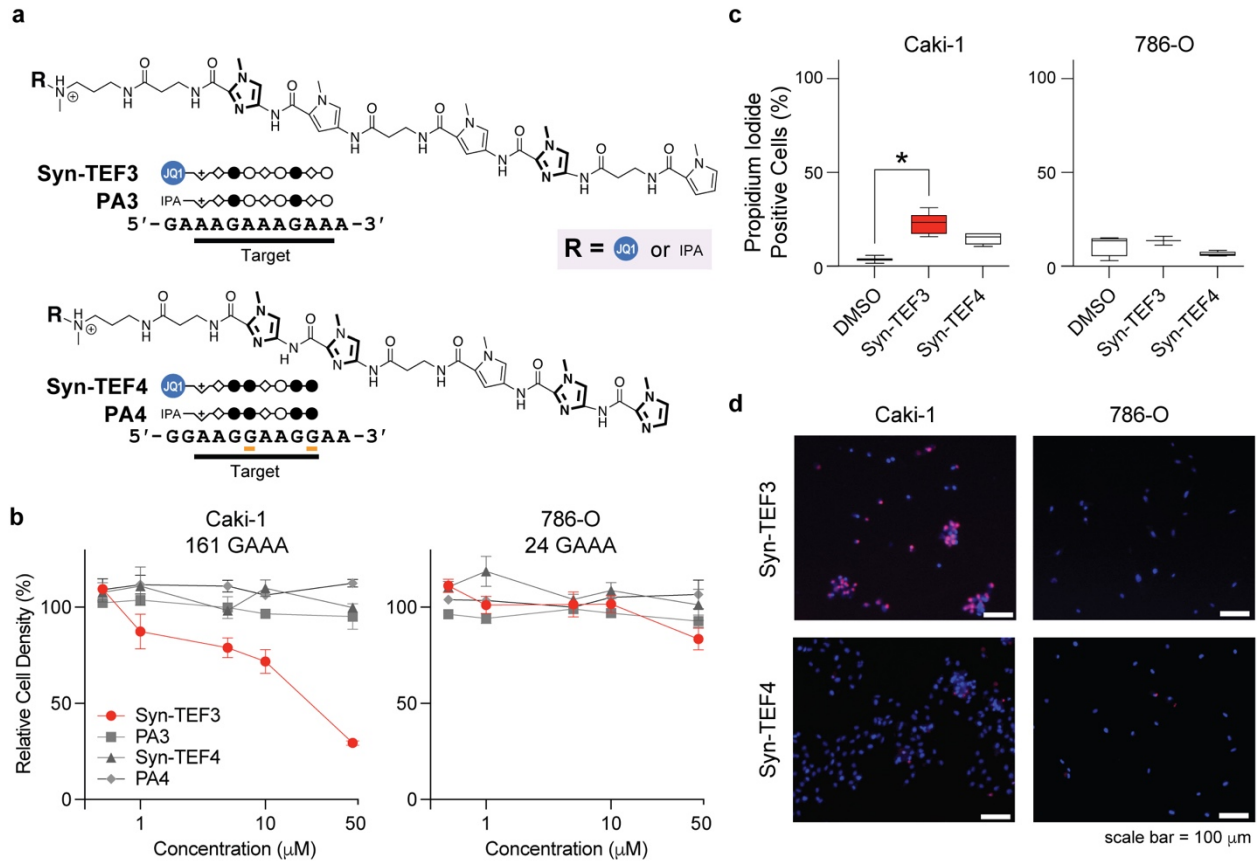

482

483

## 484 **Methods**

### 485 **Data curation**

486 We obtained white-listed data from the International Cancer Genome Consortium (ICGC) and  
487 The Cancer Genome Atlas (TCGA) pan-cancer analysis of whole genomes (PCAWG) dataset.  
488 Data were accessed through the Cancer Genome Collaboratory. We used the aligned reads  
489 (BAM files), which were aligned to GRCh37 as described previously<sup>25</sup>. These data are available  
490 through the PCAWG data portal (<https://docs.icgc.org/pcawg>). A list of samples included in the  
491 analysis is available in **Table S2**.

492

### 493 **Identification of somatic recurrent repeat expansions**

494 We analyzed tumor and matching normal samples for each cancer type independently.  
495 We executed ExpansionHunter Denovo (EHdn) (v0.9.0)<sup>15</sup> with the following parameters: --min-  
496 anchor-mapq 50 --max-irr-mapq 40. To prioritize loci, we developed a workflow termed Tandem  
497 Repeat Locus Prioritization in Cancer (TROPIC). We included loci from chr1-22, X, and Y for  
498 downstream analysis. We removed loci where >10% of Anchored in-repeat read (IRR) values  
499 were >40, which is the theoretical maximum value. The p-value (a non-parametric one-sided  
500 Wilcoxon rank sum test) for each locus was used to calculate a false discovery rate (FDR) q-  
501 value. Loci with FDR < 0.10 are reported. We selected loci where >5% of samples had an  
502 Anchored in-repeat read (IRR) Quotient > 2.5. For a repeat expansion to be detected by EHdn,  
503 the tandem repeat must be larger than the sequencing read length. A somatic repeat expansion  
504 was defined as having an FDR q-value < 0.05 between tumor and normal samples. To call repeat  
505 expansions in individual cancer samples, we analyzed the distribution of tumor and normal

506 Anchored IRR values and selected a conservative threshold for the Anchored IRR Quotient  
507  $((\text{Tumor Anchored IRR} - \text{Normal Anchored IRR}) / (\text{Normal Anchored IRR} + 1)) > 2.5$  (**Extended**  
508 **Data Figure 4**).

509

### 510 **Local read depth normalization**

511 EHdn normalizes the number of Anchored IRRs for a given locus to the global read  
512 depth. To account for chromosomal amplifications and other forms of genetic variation that  
513 could alter local read depth, we performed the following normalization. For each rRE locus and  
514 sample in its corresponding cancer, samtools v1.13 was used with the parameter depth -r to find  
515 the read depth at each base pair within the locus and a 500 bp region surrounding the start and  
516 stop positions of the TR. We calculated the average read depth at each base pair and defined this  
517 as the local read depth. Finally, we calculated the local read depth-normalized Anchored IRR  
518 value specific to a sample and rRE combination by dividing the unnormalized Anchored IRR  
519 value from EHdn by the local read depth at the locus.

520

### 521 **Generation of CABOSEN cells**

522 CABOSEN cells were generated from a cabozantinib-sensitive (CABOSEN) human papillary  
523 RCC xenograft tumor grown in RAG2<sup>-/-</sup> gammaC<sup>-/-</sup> mice, as described previously<sup>50</sup>. Tumor tissue  
524 was minced with a sterile blade and the cell suspension cultured in DMEM/F-12 medium  
525 (Corning) supplemented with 10%(v/v) Cosmic Calf Serum (ThermoFisher). Cells were  
526 expanded and cryopreserved in growth medium supplemented with 10%(v/v) DMSO and cells  
527 from passage 8 were used for analysis.



528

## 529 **Analysis of rREs by gel electrophoresis**

530 We performed PCR with CloneAmp HiFi PCR Mix (Takara Biosciences, Mountain  
531 View, CA) and added DMSO to a final concentration of 5-10% (v/v) as needed. All cell lines  
532 were tested negative for mycoplasma contamination with the MycoAlert Mycoplasma Detection  
533 Kit (Lonza). Cell line identities were authenticated by STR profiling by the Genetic Resources  
534 Core Facility at Johns Hopkins University, with the exception of SNU-349, which did not match  
535 the reported STR profile of SNU-349 or any other catalogued cell line, but has a mutated *VHL*  
536 gene and expresses high levels of *PAX8* and *CA9*, consistent with ccRCC origin. A list of  
537 primers used to analyze the loci is available in **Table S6**.

538

## 539 **Visualization of repeat expansions with ExpansionHunter and REViewer**

540 To inspect the reads supporting a repeat expansion, we annotated the repeat as described  
541 on the GitHub page for ExpansionHunter. We then profiled the region with ExpansionHunter  
542 (v4.0.2) using the default settings<sup>14</sup>. The resulting reads were visualized with REViewer (v0.1.1)  
543 using the default settings. REViewer is available at <https://github.com/Illumina/REViewer>. A  
544 repeat expansion was called when the repeat tract length for one allele of the tumor sample was  
545 greater than 100 bp and exceeded the repeat tract length of either normal allele. A locus was  
546 considered validated if at least 10 cancer genomes had a repeat expansion.

547

## 548 **Validation of rREs in independent cohorts of samples**

549 Twelve pairs of matching normal and tumor samples from patients with clear cell renal  
550 cell carcinoma were obtained with the patients' informed consent *ex vivo* upon surgical tumor  
551 resection (Stanford IRB-approved protocols #26213 and #12597) and analyzed. Eighteen and 15  
552 pairs of matching normal and tumor samples for prostate and breast cancer, respectively, were  
553 obtained from the Tissue Procurement Shared Resource facility at the Stanford Cancer Institute  
554 and analyzed. Nucleic acid was isolated with either the Quick Microprep Plus kit (Catalog  
555 D7005) or the Zymo Quick Miniprep Plus kit (Catalog D7003) (Zymo Research, Irvine, CA).  
556 Gel electrophoresis was performed as described above. A locus was considered detected if a  
557 somatic repeat expansion was identified in at least one patient tumor sample compared to a  
558 matching normal sample.

559

### 560 **Downsampling Analysis**

561 For the downsampling analysis, tumor genomes from renal cell carcinoma samples were  
562 downsampled from their mean (52x) sequencing depth to 40, 30, 20, and 10x with the samtools  
563 view command. EHDn was run, as described above for each of the sequencing depths, and the  
564 Bonferroni-corrected p-value was plotted for the recurrent repeat expansion in *UGT2B7* (GAAA,  
565 chr4:69929297-69930148).

566

### 567 **Benchmarking the Local Read-Depth Normalization (LRDN) filter**

568 We benchmarked the local read depth filter *in silico* by observing its behavior with  
569 simulated reads. First, we created a reference genome containing artificially expanded repeats.  
570 We randomly selected 10 TRs located in chromosome 1 that were less than the sequencing read

571 length of 100 bp. We artificially expanded these TRs in chromosome 1 of GRCh37 with the  
572 BioPython python package (version 1.79). Next, we used wgsim (version 0.3.1-r13) to simulate  
573 reads from the reference file with the command “wgsim -N 291269925 -1 100 -2 100  
574 reference\_file.fasta output.read1.fastq output.read2.fastq”. The number of reads (specified by the  
575 -N option) was calculated to achieve 30x coverage of chromosome 1. The resulting pair of files,  
576 hereinafter referred to as the base fastq files, contained a copy number of 2 for all of the  
577 expansions.

578 To simulate copy number amplification, the read simulation process was repeated using  
579 reference files that contained only the artificially expanded repeats and their surrounding 1,000  
580 bp flanks. We created 10 pairs of fastq files, each with an increasing copy number. We specified  
581 the copy number by multiplying the number of reads to generate (wgsim -N option) by the  
582 required number. To generate the final set of fastq files, we concatenated each pair of copy  
583 number-amplified fastq files with the base fastq files. The end result is 8 pairs of fastq files that  
584 contain reads of chromosome 1 and a copy number amplification varying from 2 to 10 of the  
585 expanded repeats.

586 The base fastq file with a copy number of 2, in addition to the eight copy number-  
587 amplified fastq files, were aligned to chromosome 1 of GRCh37 with bwa-mem (v 0.6) with the  
588 default options. The resulting SAM files were converted to BAM format with samtools (v 1.15)  
589 with the default options. Finally, we ran the EHDn profile command (v 0.9.0) with the minimum  
590 anchor mapping quality set to 50 and maximum IRR mapping quality set to 40. Finally, the  
591 Anchored IRR values were extracted by overlapping the STR coordinates with the *de novo*  
592 repeat expansion calls.

593

## 594 **Short-read and long-read DNA sequencing**

595           We sequenced Caki-1 and 786-O with both short-read sequencing (60x sequencing  
596 coverage, 150 bp paired-end sequencing on a NovaSeq 6000 instrument) and long-read DNA  
597 sequencing (50x sequencing coverage, PacBio HiFi sequencing on a Sequel IIe instrument). We  
598 aligned the long reads to GRCh37 with pbmm2 v1.7.0, using the parameters --sort --min-  
599 concordance-perc 70.0 --min-length 50. We aligned the short reads to GRCh37 with Sentieon  
600 (v202112.01) with parameters -K 10000000 -M, an implementation of BWA-MEM, and  
601 analyzed the samples with EHdn, as described above. We included loci containing at least one  
602 sample with an Anchored IRR value >0 for further analysis. Anchored IRR values >0 arise when  
603 the repeat length exceeds the sequencing read length. To benchmark EHdn against long-read  
604 sequencing data, we manually determined the TR length of a given locus in the long-read  
605 sequencing data. If the TR length in the long-read sequencing data exceeded the short-read  
606 sequencing read length of 150 bp, we considered that locus confirmed.

607           The PacBio HiFi data were aligned to GRCh37 with pbmm2 v1.7.0 and visualized at the  
608 *UGT2B7* locus with Tandem Repeat Genotyper v0.2.0  
609 (<https://github.com/PacificBiosciences/trgt>).

610

## 611 **Analysis of rRE loci**

612           To determine if rREs were associated with any human diseases, rREs were mapped to  
613 genes with GREAT (v4.0.4, default settings)<sup>51</sup>. The resulting genes were analyzed with Enrichr  
614 using Jensen Diseases<sup>52</sup>. To determine whether repeat expansions were associated with  
615 microsatellite instability-high (MSI-High) cancers, we obtained data from Hause et al<sup>5</sup>. The

616 percentage of MSI-high cancers was obtained from colon adenocarcinoma (COAD), stomach  
617 adenocarcinoma (STAD), kidney renal cell carcinoma (KIRC), ovarian serous  
618 cystadenocarcinoma (OV), prostate adenocarcinoma (PRAD), head and neck squamous cell  
619 carcinoma (HNSC), liver hepatocellular carcinoma (LIHC), bladder urothelial carcinoma  
620 (BLCA), glioblastoma multiforme (GBM), skin cutaneous melanoma (SKCM), thyroid  
621 carcinoma (THCA), and breast invasive carcinoma (BRCA) and compared to the number of  
622 repeat expansions and the percentage of patients with at least one repeat expansion in the  
623 corresponding cancer type from the PCAWG dataset. We also overlapped cancer genomes  
624 containing rREs with the microsatellite mutation rate, which we term the STR mutation rate, and  
625 MSI calls from Fujimoto et al<sup>29</sup>. The association of rREs with STR mutation rate was assessed  
626 with the two-tailed Wilcoxon rank sum test. The association of rREs with MSI calls was assessed  
627 with Chi-square test with Yates' correction.

628         To determine whether rREs are associated with known mutational signatures, we  
629 downloaded mutational signatures from the ICGC DCC  
630 ([https://dcc.icgc.org/releases/PCAWG/mutational\\_signatures/Signatures\\_in\\_Samples](https://dcc.icgc.org/releases/PCAWG/mutational_signatures/Signatures_in_Samples)). We  
631 performed a multiple linear regression for each single-base-substitution (SBS) and doublet-base-  
632 substitution (DBS) signatures to identify predictors of the number of rREs present in a sample.  
633 To choose the predictors, we performed best subset selection on DBS and SBS signatures and  
634 included age as a possible confounding factor. We used the statsmodels v0.12.2 in Python and,  
635 specifically, the ordinary least squares model found in the statsmodels.api.OLS module to  
636 estimate the coefficients of the selected predictors in their corresponding multiple linear  
637 regression model<sup>53</sup>.

638 To determine whether repeat expansions were associated with a difference in cytotoxic  
639 activity, we calculated cytotoxic activity as previously described for four cancers that had  
640 matching RNA-seq and WGS<sup>41</sup>. For each locus, we compared cytolytic activity for patients with  
641 a repeat expansion to patients without a detected repeat expansion using a Welch's *t*-test with  
642 correction for multiple hypothesis testing (Benjamini-Hochberg FDR  $q$ -value  $< 0.05$ ). rREs were  
643 annotated with genic elements using annotatr (v1.18.1)<sup>33</sup>.

644 To determine if rREs were associated with regulatory elements, we downloaded  
645 candidate cis-regulatory elements (cCREs)<sup>34</sup> and mapped them to GRCh37 with LiftOver  
646 (UCSC)<sup>54</sup>. We determined the distance between rREs and cCREs with the bedtools closest  
647 command (v2.27.1)<sup>55</sup>, and compared this distance to the simple repeats catalog<sup>56</sup>. To compare the  
648 distance to ENCODE cCREs, a Welch's *t*-test was performed.

649 To determine if prostate cancer rREs were associated with prostate cancer susceptibility  
650 loci<sup>36</sup>, we calculated the distance to three sets of loci using the "bedtools closest" command. We  
651 calculated the distance between (1) rREs present in prostate cancer samples and prostate cancer  
652 susceptibility loci, (2) rREs not present in cancer samples and cancer susceptibility loci, and (3)  
653 simple repeats and cancer susceptibility loci. To compare the distances between these three  
654 associations, we performed a Welch's *t*-test with FDR correction (Benjamini-Hochberg).

655 To determine whether rREs were associated with replication timing, we downloaded  
656 Repli-seq replication timing data from seven cell lines from the ENCODE website (NCI-H460,  
657 T470, A549, Caki2, G401, LNCaP, and SKNMC)<sup>57</sup>. We selected regions for which all cell lines  
658 had concordant signals for analysis (early or late replication designations agreed for each cell  
659 line at a given locus). We determined whether there was a difference in the distribution of rREs  
660 across early- and late-replicating regions compared to the simple repeats catalog with

661 bootstrapping ( $n=10,000$ ). We sampled 54 loci (the number of rREs that are present in a  
662 concordant replication region) from rREs and simple repeats. A Welch's  $t$ -test was performed on  
663 the bootstrapped samples to estimate a  $p$ -value. We applied FDR correction (Benjamini-  
664 Hochberg) to the estimated  $p$ -values. To determine whether rRE status in *UGT2B7* was  
665 associated with survival outcome in clear cell RCC patients (TCGA abbreviation: KIRC), we  
666 used Welch's  $t$ -test quartile.

667 To identify motifs enriched and depleted in the rRE catalog, we followed the same  
668 method used in the Motif-Scan python module (v1.3.0)<sup>58</sup>. We compared our rRE catalog to  
669 Simple Repeats (Tandem Repeat Finder, TRF) as a control. For each unique motif present, we  
670 built a contingency table specifying the count of rREs and Simple Repeats with and without the  
671 motif. Two one-tailed Fisher's exact tests were applied to the table to test for significance in both  
672 directions, enrichment and depletion. The "stats" module in the Scipy python package (v1.7.0)  
673 was used to conduct the significance test. Since multiple hypothesis tests were performed, we  
674 applied FDR correction (Benjamini-Hochberg) for multiple hypothesis testing to the  $p$ -values,  
675 with a cutoff (FDR) of 0.01.

676 For the comparison of SNVs in COSMIC genes to rREs, we first divided cancer genomes  
677 into two categories: rRE cohort and non-rRE cohort. The rRE cohort contains all of the genomes  
678 that have at least one rRE detected ( $n = 615$ ) and the non-rRE cohort contains all of the genomes  
679 that have no rREs detected ( $n = 1897$ ). We then looked at the number of donors in the rRE cohort  
680 that have at least one mutation on a given gene (COSMIC Tier 1 genes)  $i$  and the number of  
681 donors in the non-rRE cohort that have at least one mutation on a given gene  $i$  with a  
682 contingency table. We then calculated the  $p$ -value (Fisher's exact test) for the significance of  
683 associating genes to either rRE or non-rRE cohort. This  $p$ -value calculation is repeated for all

684 COSMIC genes and then an FDR at 0.05 significance level (Benjamini-Hochberg) was  
685 employed to correct for multiple hypothesis testing.

686

### 687 **Estimation of expansions in the general population**

688 To estimate the frequency of the rREs in the general population, ExpansionHunter  
689 Denovo (version 0.9.0) was run on 1000 Genomes Project samples<sup>59</sup> (n = 2,504) (GRCh38) and  
690 Medical Genome Reference Bank<sup>60</sup> samples (n = 4,010) (GRCh37 lifted over to GRCh38).

691 The genomic coordinates of the 160 rREs (GRCh37) were padded with 1,000 bp and  
692 translated to GRCh38 coordinates with the UCSC LiftOver. Then, these rRE coordinates  
693 (GRCh38) were overlapped with loci from the population samples containing the Anchored IRR  
694 calls. rREs that overlapped with matching motifs in the population samples were selected for  
695 further analysis. We next sought to identify expanded rREs in the population samples to quantify  
696 their prevalence. To do so, we converted their global-normalized Anchored IRR values to be  
697 comparable to ICGC values. This step was necessary because sequencing read lengths from the  
698 PCAWG dataset are generally 100 bp while the read lengths from 1000Genomes and Medical  
699 Genome Reference Bank are 150 bp. The conversion follows the formula (Anchored IRR, 100  
700 bp) =  $0.5 + 1.5 * (\text{Anchored IRR, 150 bp})^{15}$ . A sample in the population samples was counted as  
701 expanded if its Anchored IRR value was greater than the 99th percentile of Anchored IRR values  
702 in the normal samples from the PCAWG dataset, a threshold that is comparable to the threshold  
703 used to call expansions in tumor samples (**Extended Data Figure 4**). In future rRE catalogs, for  
704 the rare instance where the estimated frequency of repeat expansions in the population samples is



705 higher than expected, these data could be used to further filter rREs to improve the detection of  
706 cancer-specific repeat expansions.

707 To compare the length of TRs in normal samples with and without a matching rRE in a  
708 tumor sample, donors in the Prost-AdenoCA and Kidney-RCC cohorts whose data are available  
709 for download through the Cancer Collaboratory were included (n=253). We used  
710 ExpansionHunter (v5.0.0) with the default options to genotype prostate and kidney cancer rREs  
711 in the normal samples of the selected donors. When there were two alleles of an rRE in a sample,  
712 both alleles were included and treated as distinct data points. For each rRE, we tested whether  
713 the distribution of genotypes from donors who have an expansion in their tumor samples differed  
714 from donors who did not have an expansion. Student's t-test was used to compute p-values, and  
715 FDR-correction (Benjamini-Hochberg) to adjust for multiple hypothesis testing.

716

### 717 **Association of rREs with gene expression**

718 Matching RNA-seq and WGS data were available for Kidney-RCC, Ovary-AdenoCA,  
719 Panc-AdenoCA, and Panc-Endocrine. RNA-seq data from these samples were obtained from  
720 DCC (<https://dcc.icgc.org/>) and values were converted to transcripts per million (TPM).  
721 Normalized gene expression (TPM) values were compared for samples with and without an rRE  
722 (Welch's *t*-test, with FDR correction). For isoform analysis, normalized gene expression counts  
723 were compared for samples with and without a repeat expansion using the DESeq2 (v1.32.0)  
724 package in R v4.0.5. We used the DESeq function to calculate the log<sub>2</sub> fold change values for 3  
725 isoforms of the *UGT2B7* gene (ENST00000305231.7, ENST00000508661.1,

726 ENST00000502942.1) and performed a Wald test with FDR correction using the Benjamini-  
727 Hochberg procedure (threshold  $q$ -value < 0.01).

728

## 729 **Design, synthesis, and characterization of Syn-TEFs and PAs**

730 Synthetic transcription elongation factors (Syn-TEFs) and polyamides (PAs) were  
731 designed to target a GAAA repeat (Syn-TEF3 and PA3) or a control GGAA repeat (Syn-TEF4  
732 and PA4). Syn-TEF3, Syn-TEF4, PA3, and PA4 were synthesized and purified to a minimum of  
733 95% compound purity by WuXi Apptec and used without further characterization. HPLC  
734 conditions for chemical characterization: 1.0 mL/min, Solvent A: 0.1% (v/v) trifluoroacetic acid  
735 (TFA) in H<sub>2</sub>O, Solvent B: 0.075% (v/v) TFA in acetonitrile, Gemini, Column: C18 5  $\mu$ m 110A  
736 150\*4.6mm. Full results of characterization can be found in **Fig. S2**.

737

## 738 **Treatment of RCC cell lines with synthetic transcription elongation factors (Syn-TEFs)**

739 Caki-1, and 786-O, and Caki-2 cells were obtained from ATCC and grown in RPMI 1640 media  
740 with L-glutamine (Gibco Catalog 11875093), supplemented with 10% (v/v) FBS. A498 and  
741 ACHN cells were obtained from ATCC and grown in DMEM media with glucose, L-glutamine,  
742 and sodium pyruvate (Corning Catalog 10-013-CV), supplemented with 10% (v/v) FBS. RCC-4  
743 cells were obtained from Amato Giacca (Stanford University) and grown in DMEM media with  
744 glucose, L-glutamine, and sodium pyruvate (Corning Catalog 10-013-CV), supplemented with  
745 10% (v/v) FBS. Cell lines were confirmed by STR profiling (Genetic Resource Core Facility,  
746 Johns Hopkins University) and tested negative for mycoplasma. Cells were seeded in 96-well  
747 plates on day 0. On day 1, cells were treated with the indicated molecules. Molecules were

748 dissolved in DMSO (vehicle) and added to cells (0.1% (v/v) DMSO final concentration). On day  
749 4 (72 h later), relative metabolic activity was measured as a proxy for relative cell density, with  
750 the Cell Counting Kit (CCK-8; Dojindo Molecular Technologies) per the manufacturer's  
751 instructions. Absorbance (450 nm) of cells treated with molecules was normalized to DMSO  
752 (0.1%(v/v)) or no treatment. Absorbance was measured with an Infinite M1000 microplate  
753 reader (Tecan, Mannedorf, Switzerland).

754 For microscopy, Caki-1 and 786-O cells were plated on glass-bottom 96-well plates  
755 under standard culture conditions. One day after plating, media containing either no drug,  
756 0.1%(v/v) DMSO, 50  $\mu$ M Syn-TEF3, or 50  $\mu$ M Syn-TEF4 was added, and the cells were  
757 incubated for 72 hours at 37°C. As a control, wells that received no treatment were incubated  
758 with 70%(v/v) ethanol for 30 seconds prior to staining. Cells were then stained with propidium  
759 iodide and Hoechst 33342 from the Live-Dead Cell Viability Assay Kit (Millipore Sigma,  
760 Catalog CBA415) according to manufacturers' instructions and immediately imaged at 10x  
761 magnification with a 0.17 numerical aperture CFI60 objective on a Keyence BZ-X710  
762 microscope. Four replicates were measured for each treatment condition, and the experiment was  
763 repeated three times. Quantitation was conducted using FIJI software. For statistical analyses, a  
764 one-way ANOVA with multiple comparisons was conducted with GraphPad Prism.

765

766 **Methods References**

- 767 50. Zhao, H., Nolley, R., Chan, A. M. W., Rankin, E. B. & Peehl, D. M. Cabozantinib inhibits  
768 tumor growth and metastasis of a patient-derived xenograft model of papillary renal cell  
769 carcinoma with MET mutation. *Cancer Biol. Ther.* **18**, 863–871 (2017).
- 770 51. McLean, C. Y. *et al.* GREAT improves functional interpretation of cis-regulatory regions.  
771 *Nat. Biotechnol.* **28**, 495–501 (2010).
- 772 52. Chen, E. Y. *et al.* Enrichr: interactive and collaborative HTML5 gene list enrichment  
773 analysis tool. *BMC Bioinformatics* **14**, 128 (2013).
- 774 53. Seabold, S. & Perktold, J. Statsmodels: Econometric and Statistical Modeling with  
775 Python. in *Proceedings of the 9th Python in Science Conference* (eds. van der Walt, S. &  
776 Millman, J.) 92–96 (2010). doi:10.25080/Majora-92bf1922-011.
- 777 54. Kent, W. J. *et al.* The Human Genome Browser at UCSC. *Genome Res.* **12**, 996–1006  
778 (2002).
- 779 55. Quinlan, A. R. & Hall, I. M. BEDTools: a flexible suite of utilities for comparing genomic  
780 features. *Bioinformatics* **26**, 841–842 (2010).
- 781 56. Benson, G. Tandem repeats finder: a program to analyze DNA sequences. *Nucleic Acids*  
782 *Res.* **27**, 573–580 (1999).
- 783 57. Consortium, E. P. An integrated encyclopedia of DNA elements in the human genome.  
784 *Nature* **489**, 57–74 (2012).
- 785 58. Sun, H. *et al.* Quantitative integration of epigenomic variation and transcription factor  
786 binding using MAMotif toolkit identifies an important role of IRF2 as transcription

787 activator at gene promoters. *Cell Discov.* **4**, 38 (2018).

788 59. Altshuler, D. M. *et al.* *An integrated map of genetic variation from 1,092 human genomes.*

789 *Nature* vol. 491 (2012).

790 60. Pinese, M. *et al.* The Medical Genome Reference Bank contains whole genome and

791 phenotype data of 2570 healthy elderly. *Nat. Commun.* **11**, 435 (2020).

792

### 793 **Data availability**

794 Whole-genome sequencing data (both short- and long-read DNA sequencing) from 786-

795 O and Caki-1 cell lines are deposited in NCBI with accession PRJNA868795.

796

### 797 **Acknowledgments**

798 This work was supported by NIH grants U2CCA233311 (to M.P.S.) and K99HG011467 (to

799 G.S.E.). G.S.E. was also supported by a Stanford Cancer Institute Postdoctoral Fellowship from

800 the Ellie Guardino Research Fund. Computational support from the Cancer Genomics Cloud (to

801 G.G. and G.S.E.) and an AWS Cloud Research Grant (to G.S.E.). We thank Chiara Sabatti for

802 advice on statistical analysis, Sean O'Connor for preliminary help with data processing, Kevin

803 Van Bortle for advice, and Laura Vanderploeg and Meara Algama for figures. G.S.E. thanks

804 Peter S. Kim for early advice and encouragement.

805

806 **Author Contributions**

807 G.S.E. conceived the study. G.S.E., G.G., A.C.F., J.T.L., M.A.E., M.P.S., and M.G. supervised  
808 research. G.S.E., G.G., R.A., A.S, E.D., J.P., C.M.B., K.Z., R.K.C.Y., and A.A.E. analyzed data.  
809 G.S.E., C.R.H., L.R., A.A., A.A., K.V.K., R.A.K., D.A.S., S.M.W., and T.J.M. conducted wet  
810 lab experiments. G.S.E. and M.P.S. wrote the manuscript with input from all the authors.

811

812 **Competing Interests declaration**

813 G.S.E. and M.P.S. are inventors on a patent application describing anti-proliferative agents. E.D.  
814 and M.E. are shareholders and currently or formerly employed by Illumina and Pacific  
815 Biosciences.

816

817 **Additional Information**

818 **Supplementary Information** is available for this paper.

819 Correspondence and requests for materials should be addressed to [gerwin@stanford.edu](mailto:gerwin@stanford.edu),

820 [mpsnnyder@stanford.edu](mailto:mpsnnyder@stanford.edu), or [mark@gersteinlab.org](mailto:mark@gersteinlab.org).
